# Supplementary material
Source: publisher figshare collection journal article supplement (https://karger.figshare.com/ndownloader/files/27359666)
Supplement: Supplementary file 1 [file 27359666]

**Supplemental Table 5** Number of Injections and Clinic Visits During Study Period among Diabetic Macular Edema Eyes Receiving Combined Bevacizumab and Alternative Intravitreal Therapies (Complete Case Analysis)

|  | **Number**  **(Eyes)** | **Median number of injections during 12 months interval, (IQR)** | **Median number of visits during 12 months interval, (IQR)** |
| --- | --- | --- | --- |
| **Month 12** | 99 | 6 (9 to 11) | 11 (9 to 12) |
| **Month 24** | 84 | 4.5 (3 to 7) | 8 (6 to 10) |
| **Month 36** | 66 | 5 (2 to 7) | 8 (7 to 10) |
| *IQR = interquartile range* | | | |
